# Supplementary material
Source: HighWire-hosted journal article supplement (https://cmajopen.ca/highwire/filestream/89781/field_highwire_adjunct_files/1/open-2022-0102-2-at.pdf)
Supplement: open-2022-0102-2-at.pdf [file open-2022-0102-2-at.pdf]

**Appendix 2** Modality of first cancer treatment received within 1 year after cancer diagnosis stratified by cancer type

1) Total cohort

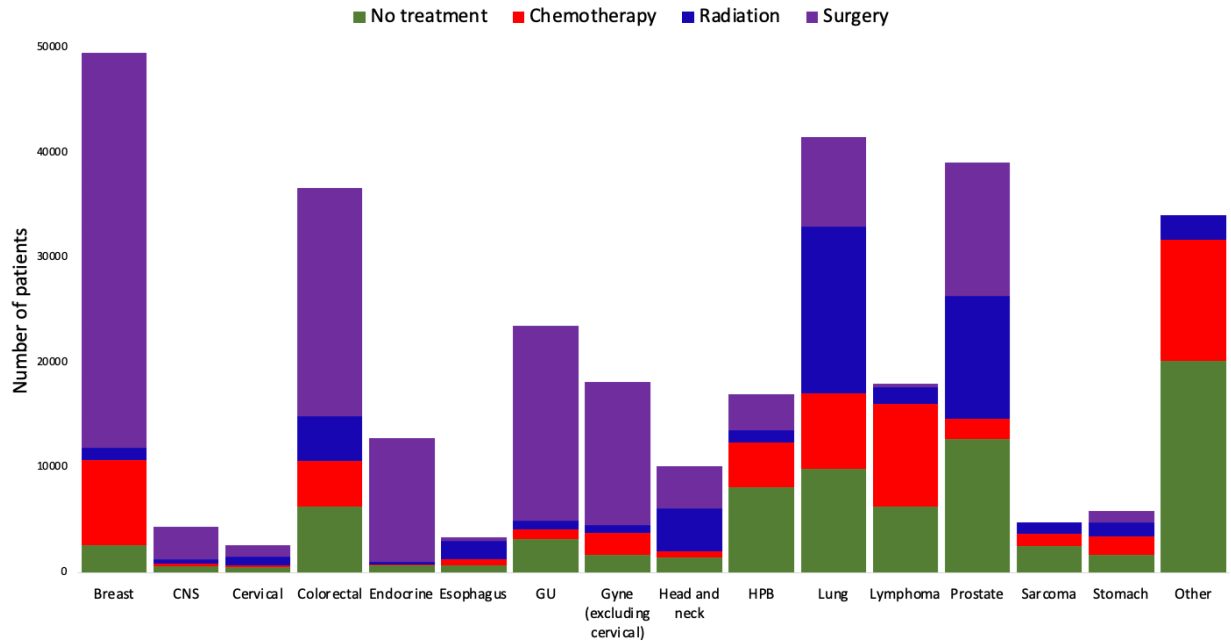

2) Comparing patients diagnosed with cancer in the pre-pandemic period (January 3, 2016-March 14, 2020) and during the pandemic (March 15, 2020-November 7, 2020)

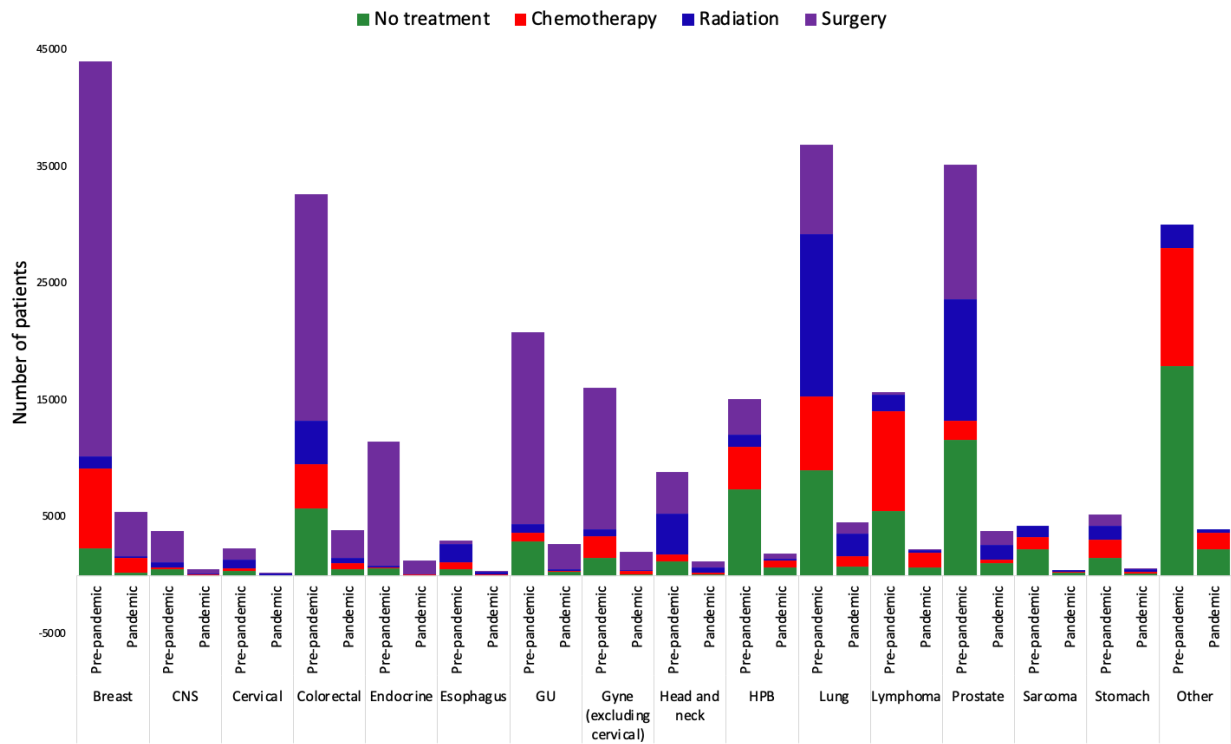

*Abbreviations:* CNS, Central nervous system; GU, Genitourinary; HPB, Hepato-pancreatic biliary.
